# Supplementary material for: Polymerization and isomerization cyclic amplification for nucleic acid detection with attomolar sensitivity
Source: Royal Society of Chemistry journal article supplement (doi:10.1039/d0sc05457g), 2021-01-01
Supplement: d0sc05457g1.pdf [file d0sc05457g1.pdf]

## Supplementary Information

### **Polymerization and isomerization cyclic amplification for nucleic acid detection with attomolar sensitivity**

Lin Lan,<sup>‡</sup> Jin Huang, <sup>‡</sup> Mengtan Liu, Yao Yin, Can Wei, Qinyun Cai\* and Xiangxian  
Meng\*

College of Biology, State Key Laboratory of Chemo/Biosensing and Chemometrics,  
College of Chemistry and Chemical Engineering, Hunan University, Changsha, P. R.  
China, 410082.

<sup>‡</sup>These authors contributed equally to this work.

\*Email: [xxmeng@hnu.edu.cn](mailto:xxmeng@hnu.edu.cn), [qycal0001@hnu.edu.cn](mailto:qycal0001@hnu.edu.cn).

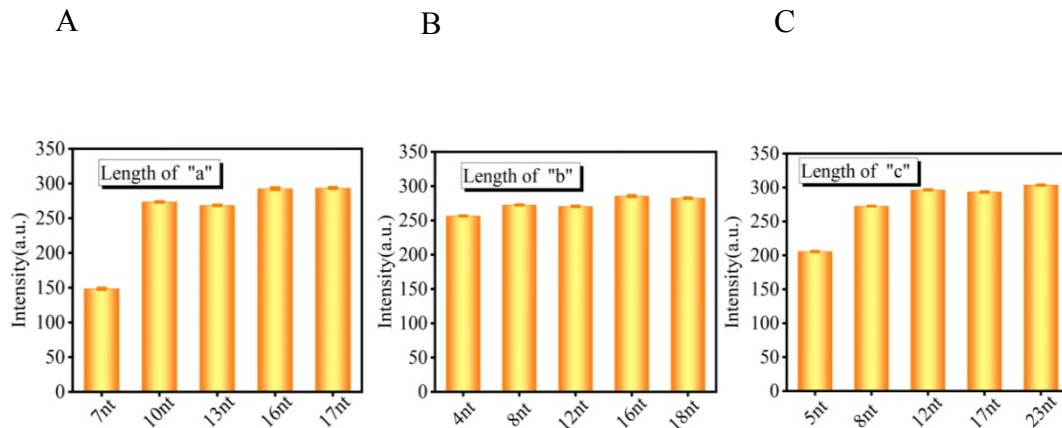

**Fig S1: optimization of lengths of domain a, b, c of the hairpin probe.** (A) Optimization of domain a (7nt、10nt、13nt、16nt、17nt) of the hairpin probe. The base number is 7nt, the fluorescence signal is relatively weak, but at 8-17 bases, the fluorescence signal is at a relatively strong level. (B) Optimization of domain b (4nt、8nt、12nt、16nt、18nt) of the hairpin probe. It could be seen that the fluorescence intensity of b was almost the same from 4-18 nt, and even when B is o, similar results were obtained (the results are not shown). (C) Optimization of domain c (5nt、8nt、12nt、17nt、23nt) of the hairpin probe. It could be seen that the all of lengths from 10nt to 23nt had similar and strong signals. Domain a (16nt), domain b (4nt) and domain c (17nt) were chosen as the length of the hairpin probe in the following PICA mechanism experiments except for special indication.

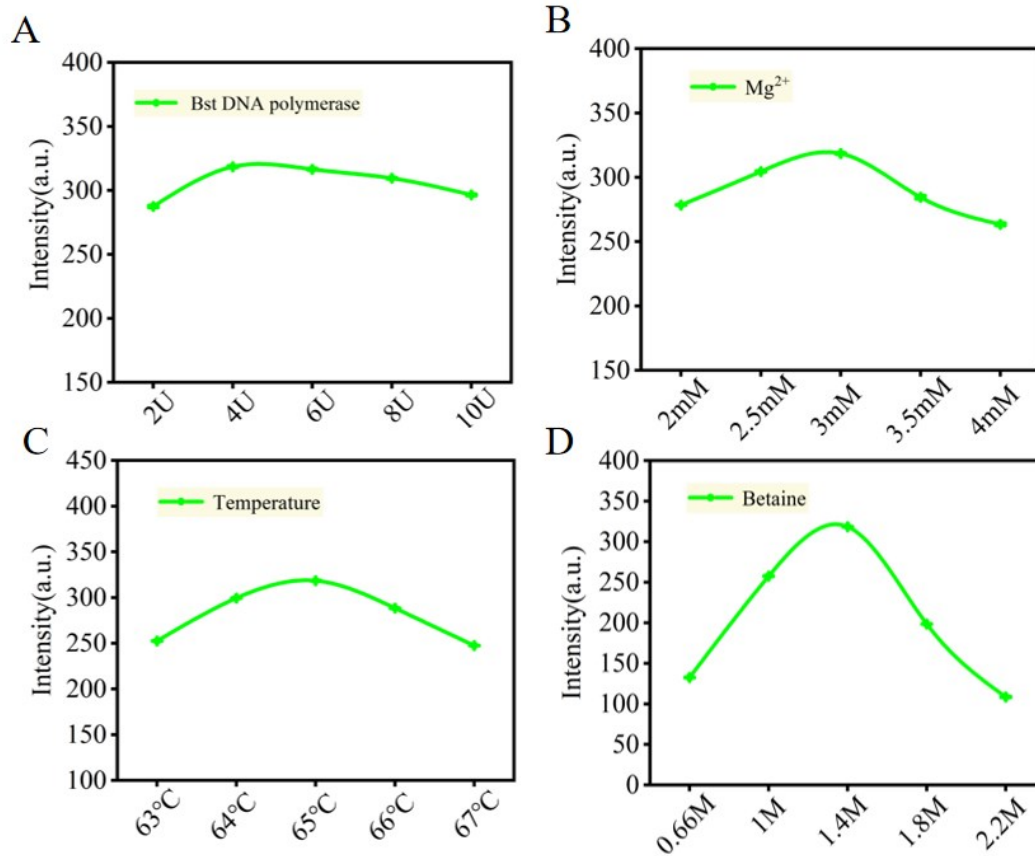

**Fig S2. Condition optimization of the PICA reaction.** (A) Optimization of Bst DNA polymerase, (B) Optimization of Mg<sup>2+</sup>, (C) Optimization of temperature and (D) Optimization of betaine. 4U Bst DNA polymerase, 3mM Mg<sup>2+</sup>, 65 °C and 1.4M betaine were chosen in the PICA reaction.

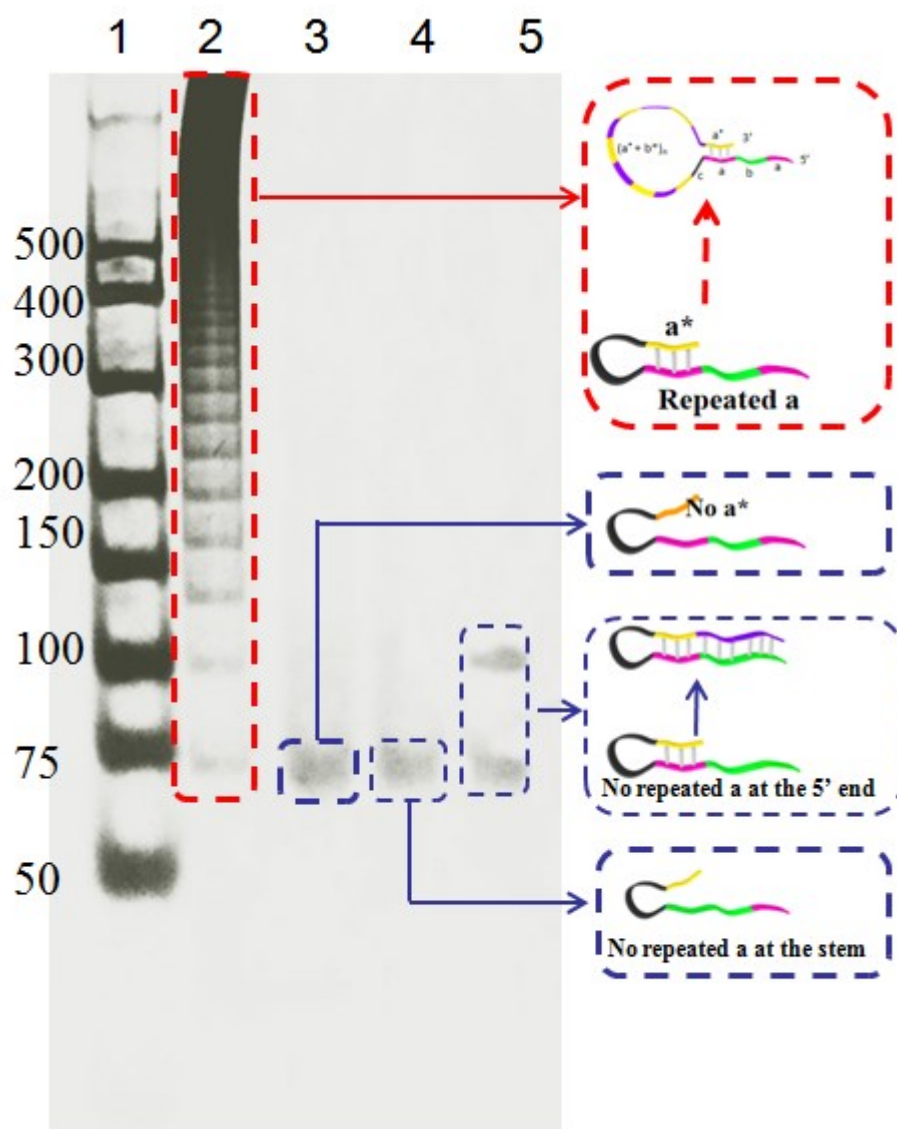

**Figure S3. Necessity analysis of the repeated a and a\* in PICA.** From the 8% PAGE gel analysis, it was known that only when the hairpin probe had a\* at the 3' end and repeated a at the 5' end simultaneously, the PICA reaction could happen. (lane 1: DNA marker; lane 2: PICA product from the hairpin probe with a\* at 3' the end; lane 3: PICA product from the hairpin probe without a\* at the 3' end; lane 4: PICA product from the hairpin probe without repeated a at the stem; lane 5: PICA product from the hairpin probe without repeated a at the 5' end).

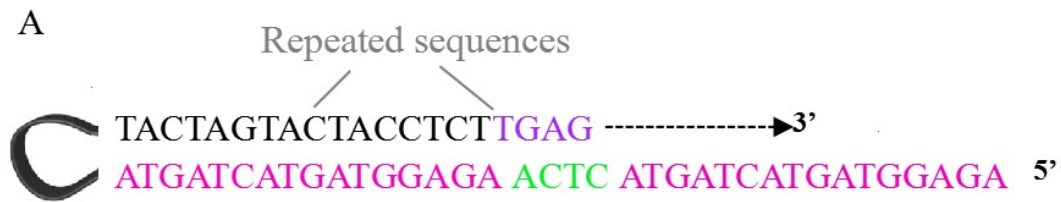

B

| Nucleic acids                              |       | Sequences (5'-3')                                                                                                                                                                                                                                                                         |
|--------------------------------------------|-------|-------------------------------------------------------------------------------------------------------------------------------------------------------------------------------------------------------------------------------------------------------------------------------------------|
| 20-bp tandem repeats with variable numbers | 227bp | TACTAGTACTACCTCTTGAGTACTACTA<br>CTAGGATCTTGCGTACTAGTACGCCCT<br>CTTGAGACCTAGTTCAAAATGTGCTG<br><b>AG</b> TACTAGAGCTACCGGTCTTTGCGTA<br>CTTGCAATCCATCTTGGAGTACTAGTA<br>CTACCTCTTCGGCTACTAGTAGTACCT<br><b>GATAAG</b> TACTAGTTGTACTCTAGAGTT<br><b>GAG</b> TACTAGTACTACTCTATGGGACTA<br>GTAGTACCC |

**Fig S4.** the PICA products were subcloned into a TA cloning vector, and sequenced. (A) The predicted repeated sequence of the hairpin probe by PICA. The hairpin probe with domain a, b and c. The red part represents domain a, the green part represents domain b, the black part represents domain c, and the orange part represents domain a\*. The hairpin probes are formed by ligation corresponding fragments (a+b+a and c+a\*). (B) The sequencing data of 20-bp amplification products. The dotted line represented the insertion of unexpected bases. the bold indicates the mutated base.

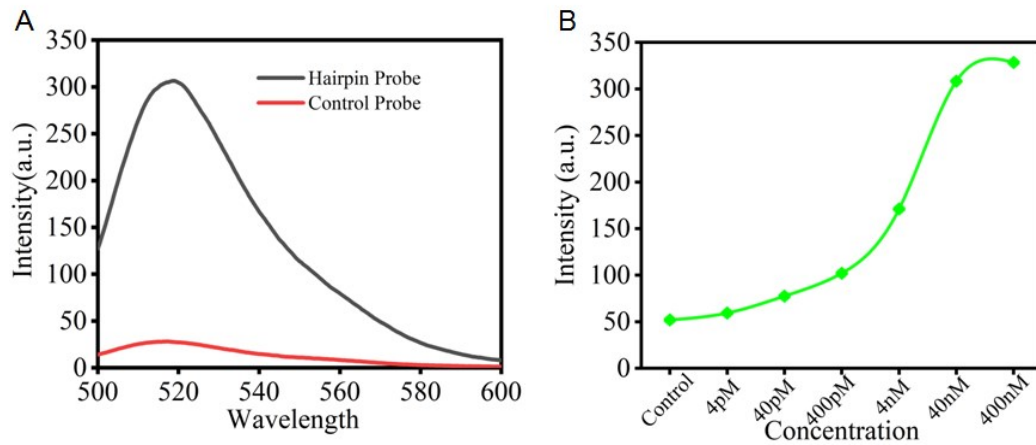

**FigS5. Fluorescence analysis of PICA.** (A) Fluorescence signal of PICA products between the hairpin probe and control probe. Here, hairpin Probe without a\*( Table S2) was chosen the control probe. (B) Relationship between fluorescent intensities and the concentrations of hairpin probes. It could be seen that the sensitivity of the assay could be as low as 4pM.

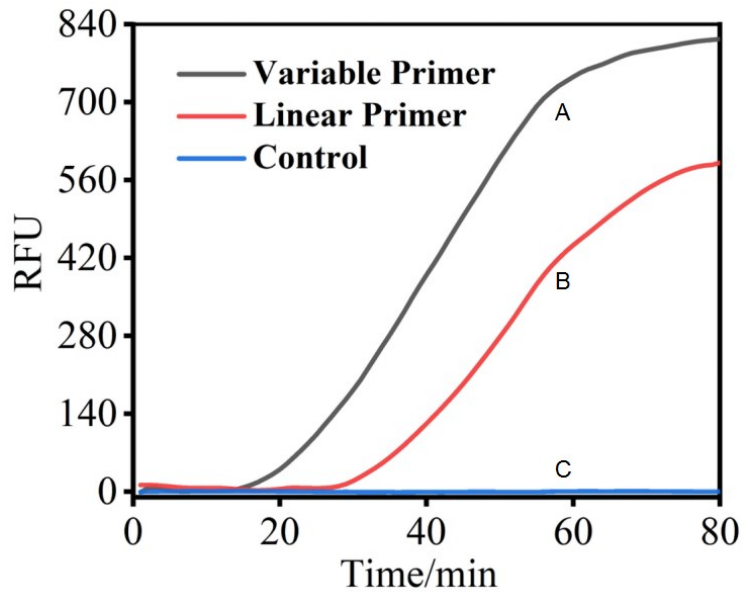

**FigS6. Fluorescence analysis of CRT.** Real-time monitoring of the fluorescence of cyclic reverse transcription with curve A (variable primer + let-7d +reverse transcriptase), with curve B (linear primer + let-7d +reverse transcriptase), with curve C (variable primer + H<sub>2</sub>O +reverse transcriptase).

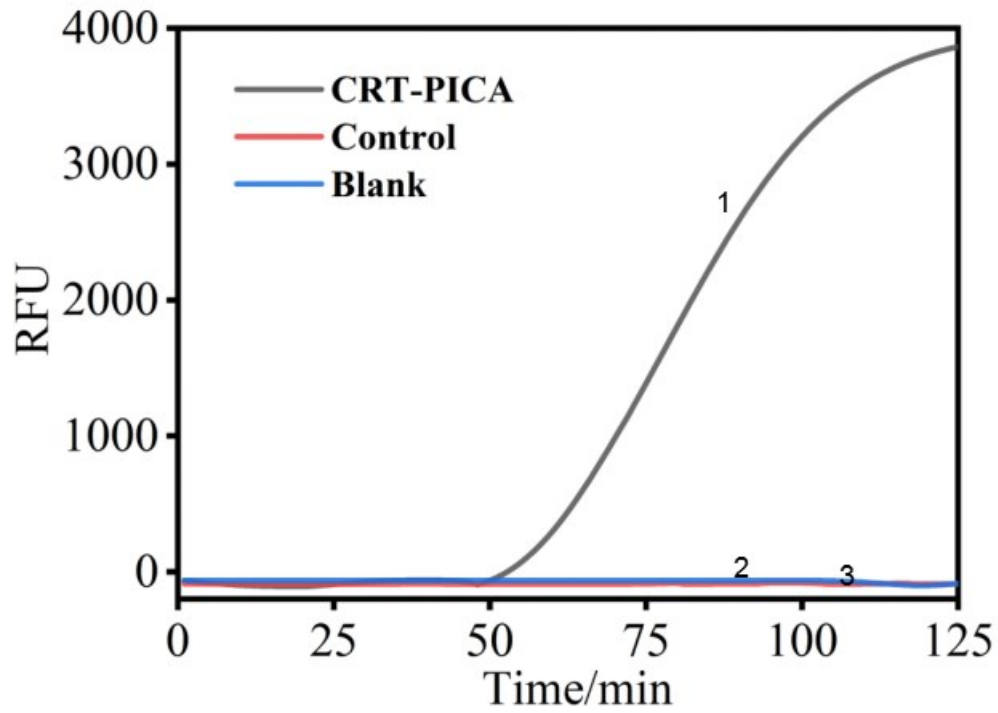

**FigS7. Fluorescence analysis of CRT-PICA.** curve 1: variable primer + let-7d + two enzymes (reverse transcriptase + Bst polymerase); curve 2: variable primer + miR122 + two enzymes; curve 3: variable primer + H<sub>2</sub>O + two enzymes.



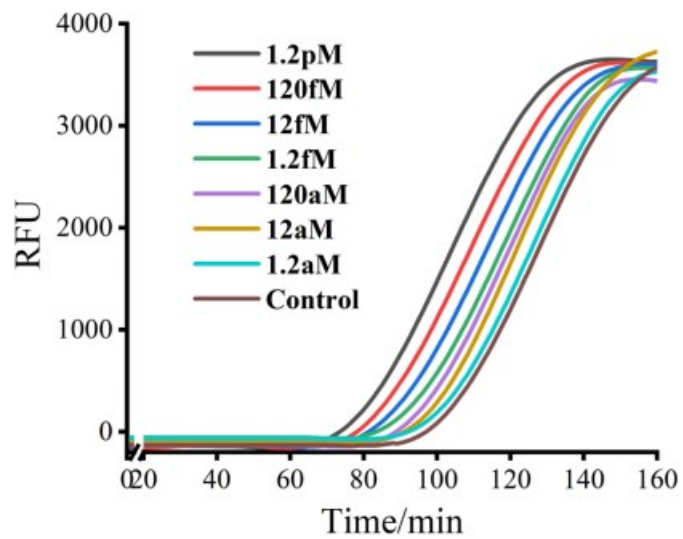

**Fig S8. Fluorescence analysis of CRT-PICA.** the target miRNA let7d in the range from 1.2 aM to 1.2 pM by real-time measurement of the fluorescence intensity.

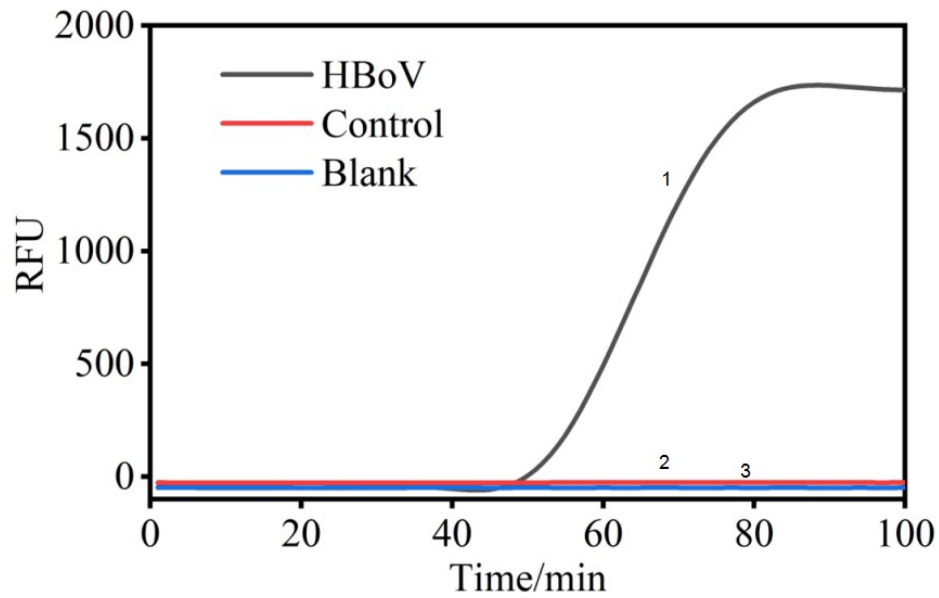

**FigS9.** Real-time monitoring of the fluorescence of CR-PICA from HBoV. (A) curve 1: variable primer + HBoV + Bst polymerase; curve 2: variable primer + Cpn+ Bst polymerase; curve 3: variable primer + H<sub>2</sub>O+ Bst polymerase.

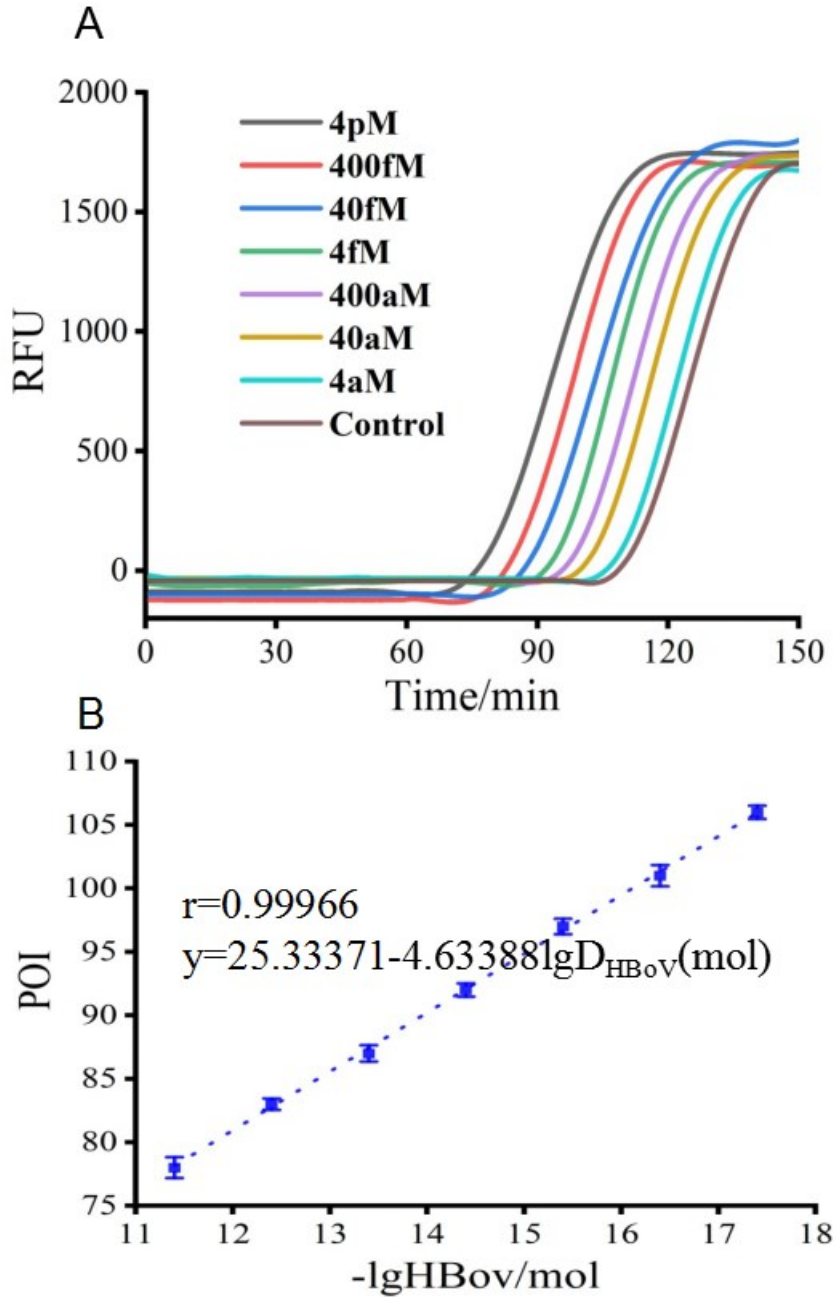

**FigS10.** Fluorescence analysis of CR-PICA. (A) The real-time fluorescence curve for the CR-PICA detection platform triggered by HBoV. (B) Relationship between the POI value and the logarithm of the amount of HBoV. the HBoV could be detected quantitatively in the range from 4aM to 4pM by real-time measurement of the fluorescence intensity of the CR-PICA products with the help of SYBR Green II.

|               | Length | Sequence(5'-3')                                                             |
|---------------|--------|-----------------------------------------------------------------------------|
| Length of "a" | 7nt    | AGAGGTACTCATTTCCTTTTCTCTATTTAAGAGGTAAGTTGCCTTCAGAACTCTACCTCT                |
|               | 10nt   | AGAGGTAGTACTCATTTCCTTTTCTCAGAGGTAGTAAGTTGCCTTCAGAACTCTACTACCTCT             |
|               | 13nt   | AGAGGTAGTACTACTCATTTCCTAGAGGTAGTACTAAGTTGCCTTCAGAACTCTAGTACTACCTCT          |
|               | 16nt   | AGAGGTAGTACTAGTACTCAAGAGGTAGTACTAGTAAGTTGCCTTCAGAACTCTACTAGTACTACCTCT       |
|               | 17nt   | AGAGGTAGTACTAGTATCTAGAGGTAGTACTAGTATAGTTGCCTTCAGAACTCTACTAGTACTACCTCT       |
| Length of "b" | 4nt    | AGAGGTAGTACTAGTACTCAAGAGGTAGTACTAGTAAGTTGCCTTCAGAACTCTACTAGTACTACCTCT       |
|               | 8nt    | AGAGGTAGTACTAGTCTCATTTCAGAGGTAGTACTAGAGTTGCCTTCAGAACTCTTAGTACTACCTCT        |
|               | 12nt   | AGAGGTAGTACTCTCATTTCCTTTAGAGGTAGTACTAGTTGCCTTCAGAACTCTAGTACTACCTCT          |
|               | 16nt   | AGAGGTAGTACTCATTTCCTTTTCTCAGAGGTAGTAAGTTGCCTTCAGAACTCTACTACCTCT             |
|               | 18nt   | AGAGGTAGTCTCATTTCCTTTTCTCTAAGAGGTAGTAGTTGCCTTCAGAACTCTACTACCTCT             |
| Length of "c" | 5nt    | AGAGGTAGTACTAGTACTCAAGAGGTAGTACTAGTAAGTTGFACTAGTACTACCTCT                   |
|               | 8nt    | AGAGGTAGTACTAGTACTCAAGAGGTAGTACTAGTAAGTTGCCTFACTAGTACTACCTCT                |
|               | 12nt   | AGAGGTAGTACTAGTACTCAAGAGGTAGTACTAGTAAGTTGCCTTCAGFACTAGTACTACCTCT            |
|               | 17nt   | AGAGGTAGTACTAGTACTCAAGAGGTAGTACTAGTAAGTTGCCTTCAGAACTCTACTAGTACTACCTCT       |
|               | 23nt   | AGAGGTAGTACTAGTACTCAAGAGGTAGTACTAGTAAGTTGCCTTCAGAACTCTACTACTACTAGTACTACCTCT |

**TableS1.** The hairpin probes with different length of domain a, b and c. The red part represents domain a, the green part represents domain b, the black part represents domain c, and the orange part represents domain a\*. The hairpin probes are formed by ligation corresponding fragments (a+b+a and c+a\*).

| Species                                            | Sequence (5'-3')                                                          |
|----------------------------------------------------|---------------------------------------------------------------------------|
| Hairpin Probe                                      | AGAGGTAGTACTAGTACTCAAGAGGTAGTACTAGTAAGTTGCCTTCAGAACTCTACTAGT<br>ACTACCTCT |
| Hairpin<br>Probe without a*                        | AGAGGTAGTACTAGTACTCAAGAGGTAGTACTAGTAAGTTGCCTTCAGAACTCTACCGA<br>ATACTCTAA  |
| Hairpin<br>Probe without repeat a<br>at the stem   | AGAGGTAGTACTAGTACTCAAGAGGTAGTACTAGTAAGTTGCCTTCAGAACTCTACTAGT<br>ACTACCTCT |
| Hairpin<br>Probe without repeat a<br>at the 5' end | AGAGGTAGTACTAGTACTCAAGAGGTAGTACTAGTAAGTTGCCTTCAGAACTCTACTAGT<br>ACTACCTCT |

**TableS2.** The sequence of the hairpin probe was equipped with a\* and repeated a for the PICA reaction. The red part represents domain a of the hairpin probe, the green part represents domain b, the black part represents domain c, and the orange part represents domain a\*. The blue part is different from the hairpin probe. The hairpin probes are formed by ligation corresponding fragments (a+b+a and c+a\*).

| Species | Sequence (5'-3')                                                   |
|---------|--------------------------------------------------------------------|
| Hairpin | AGAGGTAGTACT GAGTCTGA <u>AGGCCT</u> AGAGGTAGTACT AGTTGCCTTCAGAACTC |
| Probe   | AGTACTACCTCT                                                       |
| Primer  | GTAGTACTGAGTTCTGAAG                                                |

**TableS3.** The sequences of hairpin probe with a restriction site (underlined base) in the b domain and the corresponding primer. The red part represents domain a of the hairpin probe, the green part represents domain b, the black part represents domain c, and the orange part represents domain a\*. The hairpin probe is formed by ligation corresponding fragment (a+b+a and c+a\*).

| Species   | Sequence (5'-3')          |
|-----------|---------------------------|
| P1-Primer | AGTAAGTTGCCTTCAGAACTCTAC  |
| P2-Primer | GGGGGAGAGGTAGTACTAGTACTCA |

TableS4. The sequences of primers used in the sequencing for PICA products.

| Species         | Sequence (5'-3')                             |
|-----------------|----------------------------------------------|
| Variable Primer | AGAGGTAGTAGAGTTCTGAAGGCCTTAGAGGTAGTAATGCAACC |
| Linear Primer   | AGAGGTAGTAGAGTTCTGAAGGCCTTGAATGAAACAATGCAACC |
| Let7d           | AGAGGUAGUAGGUUGCAUAGUU                       |
| miR122          | UGGAGUGUGACAAUGGUGUUUG                       |

**TableS5.** The sequences of the Variable Primer and Linear Primer and their related targets in the CRT-PICA reaction system for miRNA detection.



|                    |      | Sequence (5'-3')                              |
|--------------------|------|-----------------------------------------------|
| Length<br>of " a " | 7nt  | AGAGGTAGAGTTCTGAAGGCCTAGAGGTAATGCAACC         |
|                    | 8nt  | AGAGGTAGGAGTTCTGAAGGCCTAGAGGTAGATGCAACC       |
|                    | 9nt  | AGAGGTAGTGAGTTCTGAAGGCCTAGAGGTAGTATGCAACC     |
|                    | 10nt | AGAGGTAGTAGAGTTCTGAAGGCCTAGAGGTAGTAATGCAACC   |
|                    | 11nt | AGAGGTAGTATGAGTTCTGAAGGCCTAGAGGTAGTATATGCAACC |
| Length<br>of " c " | 5nt  | AGAGGTAGTAGAGTTCTGAAGGCCTAGAGGTAGTACAACC      |
|                    | 6nt  | AGAGGTAGTAGAGTTCTGAAGGCCTAGAGGTAGTAGCAACC     |
|                    | 7nt  | AGAGGTAGTAGAGTTCTGAAGGCCTAGAGGTAGTATGCAACC    |
|                    | 8nt  | AGAGGTAGTAGAGTTCTGAAGGCCTAGAGGTAGTAATGCAACC   |
|                    | 9nt  | AGAGGTAGTAGAGTTCTGAAGGCCTAGAGGTAGTAAATGCAACC  |

**TableS6.** The sequences of the "a" and "c" length sequences in the variable primer for let 7d. The different length of "a" (7,8,9,10,11nt) and The different length of "c" (5,6,7,8,9nt) were tested. The red bases represented "a". The green bases represented "b". The black bases represented "c".

| Length of "a" | POI  | Length of "c" | POI  |
|---------------|------|---------------|------|
| 7             | 78   | 5             | 80   |
| 8             | 73.6 | 6             | 76   |
| 9             | 70.5 | 7             | 71   |
| 10            | 68.8 | 8             | 68.8 |
| 11            | 68.9 | 9             | 69   |

**Table S7.** Optimization of the "a" and "c" length sequences in the variable primer of CRT-PICA for miRNA Let 7d. From the corresponding POI value, the 10 nt length of "a" and the 8 nt length of "c" were chosen in the following experiments, respectively.

| Variable Primer (5'-3')                          | target | Sequence (5'-3')       |
|--------------------------------------------------|--------|------------------------|
| TGAGGTAGTAGAGATTGCTAGTCGTTTGAGGTA<br>GTAATACAACC | let7a  | UGAGGUAGUAGGUUGUAUAGUU |
|                                                  | let7e  | UGAGGUAGGAGGUUGUAUAGUU |
|                                                  | let7f  | UGAGGUAGUAGAUGUAUAGUU  |

**TableS8.** Sequences of the variable primer of let7a and targets of let7a, let7e and let7f. red base indicate mismatched bases to let7a.

| miRNA        | miRNA sequence (5'-3')     | Variable Primer (5'-3')                        |
|--------------|----------------------------|------------------------------------------------|
| miR-122-5p   | UGGAGUGUGACAAUG<br>GUGUUUG | TGGAGTGTGACTATCTTCTAGTCGTTTGGAGTGTGATCACCATTG  |
| miR-30c-1-3p | CUGGGAGAGGGUUGU<br>UUACUCC | CTGGGAGAGGTACTATGATAGTAACTGGGAGAGGTTTAAACAAC   |
| miR-21a-5p   | UAGCUUAUCAGACUG<br>AUGUUGA | TAGCTTATCACAGTATGCTAGTCGTTTAGCTTATCATCATCAGTC  |
| let-7a       | UGAGGUAGUAGGUUG<br>UAUAGUU | TGAGGTAGTAGAGATTGCTAGTCGTTTGGAGTAGTAATACAACC   |
| miR-1a-3p    | UGGAAUGUAAAGAAG<br>UAUGUAU | TGGAATGTAAACAGTATGCTAGTCGTTTGGAAATGTAAATACTTCT |
| miR-199a     | ACAGUAGUCUGCACA<br>UUGGUUA | ACAGTAGTCTGAGTAACTAGTGTATACAGTAGTCTCAATGTGC    |
| miR-196a     | UAGGUAGUUUCAUGU<br>UGUUGGG | TAGGTAGTTTCAGTATCGTAGTCCATTAGGTAGTTTACAACATG   |

**TableS9.** Sequences of 7 miRNAs and related variable primers for CRT-PICA in mouse tissues.

| miRNA           | miRNA sequence(5'-3')      | RT primers(5'-3')                                                    | Taqman Probe(5'-3')                               |    | Primers (5'-3')            |
|-----------------|----------------------------|----------------------------------------------------------------------|---------------------------------------------------|----|----------------------------|
| miR- 122- 5p    | UGGAGUGUGACAAUGGU<br>GUUUG | CCTCAAACGAGTGCAGGG<br>TCCGAGGTATTGCGACTCG<br>TTTGAGGTAGTTCAAACAC     | (6-<br>FAM)CGTTTGAGGT<br>AGTTCAAACACCA<br>(BHQ1)  | fw | CTGGAGTGTGACAATGG<br>TG    |
|                 |                            |                                                                      |                                                   | rv | GTGCAGGGTCCGAGGT           |
| miR- 30c- 1- 3p | CUGGGAGAGGGUUGUUU<br>ACUCC | CCTCAAACGAGTGCAGGG<br>TCCGAGGTATTGCGACTCG<br>TTTGAGGTAGTTCGGAGTA     | (6-<br>FAM)GTTTGAGGTA<br>GTCGGAGTAAAC(BH<br>HQ1)  | fw | CCTGGGAGAGGGTTGTT<br>T     |
|                 |                            |                                                                      |                                                   | rv | GTGCAGGGTCCGAGGT           |
| miR-24-3p       | UGGCUCAGUUCAGCAGG<br>AACAG | CCTCAAACGAGTGCAGGG<br>TCCGAGGTATTGCGACTCG<br>TTTGAGGTGCTGTGTTGC      | (6-<br>FAM)GTTTGAGGTC<br>GTCTGTTCTGTC(BH<br>Q1)   | fw | TGCTCAGTTCAGCAGG<br>A      |
|                 |                            |                                                                      |                                                   | rv | GTGCAGGGTCCGAGGT           |
| let-7a          | UGAGGUAGUAGGUUGUA<br>UAGUU | CCTCAAACGAGTGCAGGG<br>TCCGAGGTATTGCGACTCG<br>TTTGAGGTAGTAATAACA<br>C | (6-<br>FAM)TCGTTTGAGGT<br>AGTAATAACAACC(BH<br>Q1) | fw | GCCGCTGAGGTAGTAGG<br>TTGTA |
|                 |                            |                                                                      |                                                   | rv | GTGCAGGGTCCGAGGT           |
| miR-1a-3p       | UGGAAUGUAAAGAAGUA<br>UGUAU | CCTCAAACGAGTGCAGGG<br>TCCGAGGTATTGCGACTCG<br>TTTGAGGTGTTATACATAC     | (6-<br>FAM)TCGTTTGAGG<br>TGGTATACATAC(BH<br>Q1)   | fw | GCCGTGGAATGTAAAGA<br>AGTAT |
|                 |                            |                                                                      |                                                   | rv | GTGCAGGGTCCGAGGT           |
| miR-199a        | ACAGUAGUCUGCACA<br>UGGUA   | CCTCAAACGAGTGCAGGG<br>TCCGAGGTATTGCGACTCG<br>TTTGAGGTTCGTTAACCAA     | (6-<br>FAM)CTCGTTTGAG<br>GTCGTTAACCAAT(B<br>HQ1)  | fw | GGACAGTAGTCTGCACA<br>TTGG  |
|                 |                            |                                                                      |                                                   | rv | GTGCAGGGTCCGAGGT           |
| miR-196a        | UAGGUAGUUUCAUGUUG<br>UUGGG | CCTCAAACGAGTGCAGGG<br>TCCGAGGTATTGCGACTCG<br>TTTGAGGTGTTACCAACA      | (6-<br>FAM)CTCGTTTGAG<br>GTCGTACCCAACA<br>C(BHQ1) | fw | GCGTTAGGTAGTTTCAT<br>GTTGT |
|                 |                            |                                                                      |                                                   | rv | GTGCAGGGTCCGAGGT           |

**TableS10.** Sequences of the TaqMan RT-qPCR assay in 7 miRNAs detection of mouse tissues.

| Sample           | 1a-3p | 30c-1-3p | let-7a | 24-3p  | 122-5p | 196a   | 199a   |
|------------------|-------|----------|--------|--------|--------|--------|--------|
| heart            | 93.35 | 93.36    | 91.56  | 90.27  | 91.30  | 106.23 | 99.85  |
| brain            | 111.2 | 105.56   | 101.84 | 89.07  | 101.96 | 105    | 89.01  |
| kidney           | 86.86 | 97.16    | 103.56 | 110.37 | 105.23 | 104.65 | 103.93 |
| lung             | 98.95 | 96.1     | 94.11  | 93.04  | 106.14 | 100.52 | 104.2  |
| muscle           | 82.56 | 103.24   | 98.26  | 104.34 | 98.96  | 102.1  | 106.61 |
| liver            | 94.64 | n.d.     | 88.36  | 96.67  | 87.66  | 92.65  | 99.64  |
| cereb            | 102.8 | 98.06    | 90.58  | 95.28  | 107.56 | 97.98  | 96.74  |
| Negative control | n.d.  | n.d.     | n.d.   | n.d.   | n.d.   | n.d.   | n.d.   |

| Sample | 1a-3p | 30c-1-3p | let-7a | 24-3p | 122-5p | 196a  | 199a |
|--------|-------|----------|--------|-------|--------|-------|------|
| heart  | 17.85 | 12.2     | 12     | 20.1  | 16.26  | 0     | 6.76 |
| brain  | 0     | 0        | 1.72   | 21.3  | 5.6    | 1.23  | 17.6 |
| kidney | 24.34 | 8.4      | 0      | 0     | 2.33   | 1.58  | 2.68 |
| lung   | 12.25 | 9.46     | 9.45   | 17.33 | 1.42   | 5.71  | 2.41 |
| muscle | 28.64 | 2.32     | 5.3    | 6.03  | 8.6    | 4.13  | 0    |
| liver  | 16.56 | n.d.     | 15.2   | 13.7  | 19.9   | 13.58 | 6.97 |
| cereb  | 8.4   | 7.5      | 12.98  | 15.09 | 0      | 8.25  | 9.87 |

**TableS11.** The POI value (a) and relative expression (b) of 7 miRNAs were analyzed in mouse 7 tissues by using the variable primer CRT-PICA method. The POI value was expressed as the average of 2 repeated reactions. For a given miRNA, the fold change was calculated relative to the sample with the lowest expression.

| Sample           | 1a-3p | 30c-1-3p | let-7a | 24-3p | 122-5p | 196a  | 199a  |
|------------------|-------|----------|--------|-------|--------|-------|-------|
| heart            | 25.56 | 25.88    | 22.41  | 21.53 | 21.96  | 30.4  | 28.01 |
| brain            | 38.01 | 31.26    | 26.03  | 20.99 | 26.88  | 30.1  | 20.04 |
| kidney           | 23.10 | 28.27    | 27.10  | 34.61 | 31.98  | 29.81 | 28.11 |
| lung             | 29.11 | 27.01    | 23.45  | 22.21 | 33.02  | 28.22 | 29.23 |
| muscle           | 19.02 | 29.96    | 25.01  | 30.17 | 25.79  | 28.63 | 30.15 |
| liver            | 25.98 | n.d.     | 18.76  | 26.64 | 18.20  | 22.97 | 27.66 |
| cereb            | 34.14 | 28.54    | 21.01  | 23.01 | 33.89  | 27.81 | 24.94 |
| Negative control | n.d.  | n.d.     | n.d.   | n.d.  | n.d.   | n.d.  | n.d.  |

| Sample | 1a-3p | 30c-1-3p | let-7a | 24-3p | 122-5p | 196a | 199a  |
|--------|-------|----------|--------|-------|--------|------|-------|
| heart  | 12.45 | 5.38     | 4.69   | 13.08 | 11.93  | 0    | 2.14  |
| brain  | 0     | 0        | 1.07   | 13.62 | 7.01   | 0.3  | 10.11 |
| kidney | 14.91 | 2.99     | 0      | 0     | 1.91   | 0.59 | 2.04  |
| lung   | 8.90  | 4.25     | 3.65   | 12.4  | 0.87   | 2.18 | 0.92  |
| muscle | 18.98 | 1.30     | 2.09   | 4.44  | 8.10   | 1.77 | 0     |
| liver  | 12.03 | n.d.     | 8.34   | 7.97  | 15.69  | 7.43 | 2.49  |
| cereb  | 3.87  | 2.72     | 6.09   | 11.6  | 0      | 2.59 | 5.21  |

**TableS12.** Taqman RT-qPCR method analyzes the Ct value (a) and relative expression (b) of 7 miRNAs in mouse 7 tissues (Ct value was expressed as the average of 2 replicates, for a given miRNA, the fold change was calculated relative to the sample with the lowest expression).

| Sample           | 1a-3p  | 30c-1-3p | let-7a | 24-3p  | 122-5p | 196a   | 199a   |
|------------------|--------|----------|--------|--------|--------|--------|--------|
| heart            | 93.24  | 93.28    | 91.58  | 90.25  | 91.28  | 106.28 | 99.88  |
| brain            | 110.18 | 105.58   | 101.86 | 89.03  | 102.8  | 104.88 | 89.25  |
| kidney           | 86.89  | 97.14    | 103.55 | 110.33 | 105.27 | 104.43 | 103.95 |
| lung             | 98.83  | 95.93    | 94.01  | 93.02  | 106.4  | 100.39 | 104.35 |
| muscle           | 82.43  | 103.26   | 98.23  | 104.24 | 98.93  | 102.13 | 106.49 |
| liver            | 94.53  | n.d.     | 88.38  | 96.63  | 87.63  | 92.57  | 99.72  |
| cereb            | 101.9  | 98.08    | 90.54  | 95.13  | 107.6  | 97.99  | 96.76  |
| Negative control | n.d.   | n.d.     | n.d.   | n.d.   | n.d.   | n.d.   | n.d.   |

| Sample | 1a-3p | 30c-1-3p | let-7a | 24-3p | 122-5p | 196a  | 199a  |
|--------|-------|----------|--------|-------|--------|-------|-------|
| heart  | 16.94 | 12.3     | 11.97  | 20.08 | 16.25  | 0     | 6.75  |
| brain  | 0     | 0        | 1.69   | 21.3  | 4.73   | 1.24  | 17.55 |
| kidney | 23.29 | 8.44     | 0      | 0     | 2.26   | 1.84  | 2.68  |
| lung   | 11.35 | 9.65     | 9.54   | 17.31 | 1.03   | 35.7  | 2.48  |
| muscle | 27.75 | 2.32     | 5.32   | 6.09  | 8.6    | 4.2   | 0     |
| liver  | 15.65 | n.d.     | 15.17  | 13.7  | 19.9   | 13.65 | 6.89  |
| cereb  | 8.28  | 7.5      | 13.01  | 15.2  | 0      | 8.26  | 9.74  |

**TableS13.**The POI value (a) and relative expression (b) of 7 miRNA profiles in mouse 7 tissues measured using multiple methods. The POI value was expressed as the average of 2 repeated reactions. The fold change was calculated relative to the sample with the lowest expression for a given miRNA.



| <b><math>\Delta</math>POI ( relative to singleplex protocol)</b> |       |          |        |       |        |       |       |
|------------------------------------------------------------------|-------|----------|--------|-------|--------|-------|-------|
| Sample                                                           | 1a-3p | 30c-1-3p | let-7a | 24-3p | 122-5p | 196a  | 199a  |
| heart                                                            | -0.11 | -0.08    | 0.02   | -0.02 | -0.02  | 0.05  | 0.03  |
| brain                                                            | -1.02 | 0.02     | 0.02   | -0.04 | 0.84   | -0.12 | 0.24  |
| kidney                                                           | 0.03  | -0.02    | -0.01  | -0.04 | 0.04   | -0.22 | 0.02  |
| lung                                                             | -0.12 | -0.17    | -0.1   | -0.02 | 0.26   | -0.13 | 0.15  |
| muscle                                                           | -0.13 | 0.02     | -0.03  | -0.1  | -0.03  | 0.03  | -0.12 |
| liver                                                            | -0.11 | n.d.     | 0.02   | -0.04 | -0.03  | -0.08 | 0.07  |
| cereb                                                            | -0.9  | 0.02     | -0.04  | -0.15 | 0.07   | 0.01  | 0.02  |
| average                                                          | -0.34 | -0.03    | -0.02  | -0.06 | 0.16   | -0.06 | 0.058 |
| St.dev.                                                          | 0.43  | 0.07     | 0.05   | 0.048 | 0.316  | 0.099 | 0.113 |

**TableS14.** Comparison of singleplex and multiplex variable primer CRT-PICA analysis.  $\Delta$ POI=POI<sub>multiplex</sub>-POI<sub>singleplex</sub>.

| Species        | Sequence(5'-3')                                                                 |
|----------------|---------------------------------------------------------------------------------|
| Variable Probe | GCCGGCAGACGAGTTCTGAAGGCCTTGCCGGCAGACTCCAATAT                                    |
| HBoV           | GCCGGCAGACATATTGGATTCCAAGATGGCGTCTGTACAACCACGTCACATATAAAATAATAAATAT<br>TCACAAG  |
| Control        | AGAGGTAGTACTAGTAGAGTTCTGAAGGCCTTATTAAGTTGCCTTCAGAACTCTACTACTACTAGTAC<br>TACCTCT |

**TableS15.** Sequences of HBoV detection for CR-PICA.

| A                  |     | B                |     |
|--------------------|-----|------------------|-----|
| Bst DNA Polymerase | POI | Mg <sup>2+</sup> | POI |
| 2U                 | 72  | 2mM              | 71  |
| 4U                 | 63  | 2.5mM            | 65  |
| 6U                 | 64  | 3mM              | 63  |
| 8U                 | 65  | 3.5mM            | 66  |
| 10U                | 68  | 4mM              | 77  |

  

| C           |     | D       |     |
|-------------|-----|---------|-----|
| Temperature | POI | Betaine | POI |
| 63 °C       | 68  | 0.66M   | 81  |
| 64 °C       | 64  | 1M      | 67  |
| 65 °C       | 63  | 1.4M    | 63  |
| 66 °C       | 65  | 1.8M    | 74  |
| 67 °C       | 73  | 2.2M    | 83  |

  

| E             |      | F             |      |
|---------------|------|---------------|------|
| Length of "a" | POI  | Length of "c" | POI  |
| 7             | 76   | 5             | 73   |
| 8             | 70   | 6             | 71   |
| 9             | 67   | 7             | 68   |
| 10            | 63   | 8             | 63   |
| 11            | 63.8 | 9             | 63.3 |

**Table S16. Condition optimization of the CR-PICA reaction.** (A) Optimization of Bst DNA polymerase, (B) Optimization of Mg<sup>2+</sup>, (C) Optimization of temperature and (D) Optimization of betaine. 4U Bst DNA polymerase, 3mM Mg<sup>2+</sup>, 65 °C and 1.4M betaine were chosen in the PICA reaction. Optimization of the "a" (E) and "c" (F) length sequences in the variable primer of CR-PICA for HBoV. From the corresponding POI value, the 10nt length of "a" and the 8nt length of "c" were chosen in the following experiments, respectively.

|                 | Length | Sequence (5'-3')                                       |
|-----------------|--------|--------------------------------------------------------|
| Length of " a " | 7nt    | GCCGGCAGAGTTCTGAAGGCCTG <b>CCGGCA</b> TCCAATAT         |
|                 | 8nt    | GCCGGCAGAGAGTTCTGAAGGCCTG <b>CCGGCAG</b> TCCAATAT      |
|                 | 9nt    | GCCGGCAGAGAGTTCTGAAGGCCTG <b>CCGGCAGAT</b> TCCAATAT    |
|                 | 10nt   | GCCGGCAGACGAGTTCTGAAGGCCTG <b>CCGGCAGACT</b> TCCAATAT  |
|                 | 11nt   | GCCGGCAGACTGAGTTCTGAAGGCCTG <b>CCGGCAGACT</b> TCCAATAT |
| Length of " c " | 5nt    | GCCGGCAGACGAGTTCTGAAGGCCTG <b>CCGGCAGAC</b> AATAT      |
|                 | 6nt    | GCCGGCAGACGAGTTCTGAAGGCCTG <b>CCGGCAGACCA</b> AATAT    |
|                 | 7nt    | GCCGGCAGACGAGTTCTGAAGGCCTG <b>CCGGCAGACCA</b> AATAT    |
|                 | 8nt    | GCCGGCAGACGAGTTCTGAAGGCCTG <b>CCGGCAGACT</b> TCCAATAT  |
|                 | 9nt    | GCCGGCAGACGAGTTCTGAAGGCCTG <b>CCGGCAGACAT</b> TCCAATAT |

**TableS17.** The sequences of the "a" and "c" length sequences in the variable primer for HBoV. The different length of "a" (7,8,9,10,11nt) and The different length of "c" (5,6,7,8,9nt) were tested. The red bases represented "a". The green bases represented "b". The black bases represented "c".
